# Supplementary material
Source: PubMed Central journal article supplement (PMC6196121)
Supplement: NIHMS962559-supplement-supplement_1.pdf [file NIHMS962559-supplement-supplement_1.pdf]

**Supplementary Table 1: Clinical Characteristics for Cohort 3 (All Other Gating Mutations/non-G551D or R117H) Patients taking Ivacaftor**

| Variable                        | Absolute Change |    | Mean (SD)   | N  | Mean  | 95% C.I.       | P-value |
|---------------------------------|-----------------|----|-------------|----|-------|----------------|---------|
|                                 | Visit           | N  |             |    |       |                |         |
| ppFEV1                          | Baseline        | 21 | 68 (28.4)   | .  | .     | .              | .       |
|                                 | 1 month         | 20 | 77.6 (26.6) | 20 | 9.3   | (4.2, 14.4)    | 0.0011  |
|                                 | 3 month         | 20 | 78.6 (25.8) | 20 | 8.4   | (1.4, 15.4)    | 0.0214  |
|                                 | 6 month         | 17 | 79.8 (21.7) | 17 | 10.9  | (2.6, 19.3)    | 0.0134  |
| FEV <sub>1</sub> , L            | Baseline        | 21 | 2 (1)       | .  | .     | .              | .       |
|                                 | 1 month         | 20 | 2.3 (1)     | 20 | 0.3   | (0.2, 0.4)     | <.0001  |
|                                 | 3 month         | 20 | 2.4 (0.9)   | 20 | 0.3   | (0.1, 0.5)     | 0.0169  |
|                                 | 6 month         | 17 | 2.5 (1)     | 17 | 0.4   | (0.2, 0.6)     | 0.0019  |
| ppFVC                           | Baseline        | 21 | 81.2 (26.4) | .  | .     | .              | .       |
|                                 | 1 month         | 20 | 89.3 (22.5) | 20 | 7.4   | (1.9, 12.9)    | 0.0112  |
|                                 | 3 month         | 20 | 89.2 (21.1) | 20 | 6.3   | (1.4, 11.3)    | 0.0146  |
|                                 | 6 month         | 17 | 88 (17.4)   | 17 | 6.5   | (-1.8, 14.8)   | 0.1170  |
| FVC, L                          | Baseline        | 21 | 3 (1.2)     | .  | .     | .              | .       |
|                                 | 1 month         | 20 | 3.2 (1.2)   | 20 | 0.3   | (0.1, 0.4)     | 0.0017  |
|                                 | 3 month         | 20 | 3.3 (1.2)   | 20 | 0.3   | (0.1, 0.5)     | 0.0017  |
|                                 | 6 month         | 17 | 3.3 (1.3)   | 17 | 0.3   | (0.1, 0.6)     | 0.0170  |
| BMI, kg/m <sup>2</sup>          | Baseline        | 21 | 20.8 (4.2)  | .  | .     | .              | .       |
|                                 | 1 month         | 21 | 21.4 (4.3)  | 21 | 0.6   | (0.2, 0.9)     | 0.0023  |
|                                 | 3 month         | 20 | 21.7 (4.6)  | 20 | 1     | (0.4, 1.5)     | 0.0012  |
|                                 | 6 month         | 17 | 22.1 (4.9)  | 17 | 1.4   | (0.7, 2.1)     | 0.0009  |
| BMI, Percentile <sup>1</sup>    | Baseline        | 11 | 43.1 (26.6) | .  | .     | .              | .       |
|                                 | 1 month         | 11 | 46.4 (28.4) | 11 | 3.3   | (-2.0, 8.6)    | 0.1934  |
|                                 | 3 month         | 11 | 48.7 (31)   | 11 | 5.6   | (-2.6, 13.8)   | 0.1595  |
|                                 | 6 month         | 9  | 46.7 (33.1) | 9  | 6.2   | (-4.3, 16.8)   | 0.2106  |
| Weight, kg                      | Baseline        | 21 | 55.8 (17.7) | .  | .     | .              | .       |
|                                 | 1 month         | 21 | 57.8 (18.4) | 21 | 2     | (0.9, 3.0)     | 0.0008  |
|                                 | 3 month         | 20 | 58.7 (18.7) | 20 | 3.3   | (1.8, 4.9)     | 0.0003  |
|                                 | 6 month         | 17 | 60.4 (19.7) | 17 | 5.1   | (2.8, 7.3)     | 0.0002  |
| Weight, Percentile <sup>1</sup> | Baseline        | 11 | 41 (25.8)   | .  | .     | .              | .       |
|                                 | 1 month         | 11 | 44.6 (27.4) | 11 | 3.6   | (-1.5, 8.8)    | 0.1491  |
|                                 | 3 month         | 11 | 48.3 (28.8) | 11 | 7.4   | (-0.8, 15.5)   | 0.0711  |
|                                 | 6 month         | 9  | 50.1 (32.9) | 9  | 9.2   | (-1.7, 20.1)   | 0.0867  |
| Height, Z-Score <sup>1</sup>    | Baseline        | 11 | -0.1 (1.1)  | .  | .     | .              | .       |
|                                 | 1 month         | 11 | -0.1 (1)    | 11 | 0     | (0.0, 0.1)     | 0.2543  |
|                                 | 3 month         | 11 | 0 (1.1)     | 11 | 0.1   | (0.0, 0.2)     | 0.0655  |
|                                 | 6 month         | 9  | 0.2 (1)     | 9  | 0.2   | (0.0, 0.3)     | 0.0179  |
| Height, Percentile <sup>1</sup> | Baseline        | 11 | 45 (32.3)   | .  | .     | .              | .       |
|                                 | 1 month         | 11 | 46 (30.5)   | 11 | 1     | (-1.4, 3.4)    | 0.3728  |
|                                 | 3 month         | 11 | 48.2 (30.4) | 11 | 3.1   | (-0.8, 7.1)    | 0.1101  |
|                                 | 6 month         | 9  | 52.5 (29.6) | 9  | 5     | (0.5, 9.5)     | 0.0344  |
| Sweat Chloride, mEq/L           | Baseline        | 19 | 89.6 (20)   | .  | .     | .              | .       |
|                                 | 1 month         | 18 | 40 (18.3)   | 16 | -53.5 | (-63.3, -43.7) | <.0001  |
|                                 | 3 month         | 19 | 39.3 (20.5) | 17 | -51.4 | (-63.2, -39.5) | <.0001  |
|                                 | 6 month         | 16 | 40.3 (29.9) | 14 | -48.6 | (-67.4, -29.9) | <.0001  |
| CFQR Respiratory Score          | Baseline        | 21 | 62 (19.6)   | .  | .     | .              | .       |
|                                 | 1 month         | 21 | 78.2 (22.2) | 21 | 16.1  | (6.0, 26.3)    | 0.0035  |
|                                 | 3 month         | 20 | 82.4 (16.3) | 20 | 19.2  | (9.6, 28.7)    | 0.0005  |
|                                 | 6 month         | 17 | 77.8 (18.3) | 17 | 14.2  | (1.0, 27.4)    | 0.0366  |
| CFRSD Score                     | Baseline        | 18 | 35.2 (15.5) | .  | .     | .              | .       |
|                                 | 1 month         | 18 | 23.7 (15.2) | 18 | -11.4 | (-20.4, -2.5)  | 0.0154  |
|                                 | 3 month         | 17 | 19.7 (16.6) | 17 | -14.4 | (-26.7, -2.0)  | 0.0259  |
|                                 | 6 month         | 15 | 23.8 (15.3) | 15 | -9.3  | (-21.0, 2.5)   | 0.1130  |
| SNOT-20 Score                   | Baseline        | 18 | 1.1 (0.7)   | .  | .     | .              | .       |
|                                 | 1 month         | 18 | 0.7 (0.7)   | 18 | -0.4  | (-0.7, -0.1)   | 0.0098  |
|                                 | 3 month         | 17 | 0.7 (0.8)   | 17 | -0.4  | (-0.7, -0.1)   | 0.0168  |
|                                 | 6 month         | 15 | 0.8 (0.8)   | 15 | -0.2  | (-0.6, 0.1)    | 0.1273  |

<sup>1</sup> Percentiles and z-scores derived using CDC reference equations for individuals < 20 years of age

Supplementary Table 2: Clinical Characteristics by Age Group for Cohort 3 Patients Taking Ivacaftor

| Variable               | Visit    | Age<18 Years<br>Absolute Change |              |    |       |                |         | Age≥18 Years<br>Absolute Change |             |    |       |                |         |
|------------------------|----------|---------------------------------|--------------|----|-------|----------------|---------|---------------------------------|-------------|----|-------|----------------|---------|
|                        |          | N                               | Mean (SD)    | N  | Mean  | 95% C.I.       | P-value | N                               | Mean (SD)   | N  | Mean  | 95% C.I.       | P-value |
| ppFEV <sub>1</sub>     | Baseline | 11                              | 88.7 (16.8)  | .  | .     | .              | .       | 10                              | 45.2 (19.3) | .  | .     | .              | .       |
|                        | 1 month  | 11                              | 96.2 (13.3)  | 11 | 7.5   | (2.0, 13.0)    | 0.0120  | 9                               | 54.7 (19.9) | 9  | 11.5  | (1.0, 22.0)    | 0.0350  |
|                        | 3 month  | 11                              | 96 (17.6)    | 11 | 7.2   | (-4.6, 19.1)   | 0.2039  | 9                               | 57.4 (16.6) | 9  | 9.8   | (0.8, 18.7)    | 0.0364  |
|                        | 6 month  | 9                               | 94.6 (12.7)  | 9  | 6.1   | (-4.1, 16.2)   | 0.2058  | 8                               | 63.1 (17)   | 8  | 16.4  | (1.1, 31.8)    | 0.0393  |
| FEV <sub>1</sub> , L   | Baseline | 11                              | 2.5 (0.9)    | .  | .     | .              | .       | 10                              | 1.5 (0.9)   | .  | .     | .              | .       |
|                        | 1 month  | 11                              | 2.7 (0.9)    | 11 | 0.3   | (0.1, 0.4)     | 0.0065  | 9                               | 1.7 (0.8)   | 9  | 0.3   | (0.1, 0.5)     | 0.0080  |
|                        | 3 month  | 11                              | 2.8 (0.8)    | 11 | 0.3   | (-0.1, 0.6)    | 0.1425  | 9                               | 1.9 (0.9)   | 9  | 0.3   | (0.0, 0.5)     | 0.0325  |
|                        | 6 month  | 9                               | 2.8 (0.9)    | 9  | 0.3   | (-0.1, 0.6)    | 0.0863  | 8                               | 2 (1)       | 8  | 0.5   | (0.1, 0.8)     | 0.0106  |
| ppFVC                  | Baseline | 11                              | 100.6 (13.6) | .  | .     | .              | .       | 10                              | 59.9 (19.6) | .  | .     | .              | .       |
|                        | 1 month  | 11                              | 104.9 (13.6) | 11 | 4.3   | (-0.5, 9.2)    | 0.0755  | 9                               | 70.1 (15.1) | 9  | 11.2  | (-0.6, 23.0)   | 0.0607  |
|                        | 3 month  | 11                              | 104.1 (11.5) | 11 | 3.5   | (-3.9, 10.9)   | 0.3136  | 9                               | 70.8 (14.2) | 9  | 9.8   | (2.6, 16.9)    | 0.0140  |
|                        | 6 month  | 9                               | 100.8 (8.3)  | 9  | 1.1   | (-7.0, 9.3)    | 0.7552  | 8                               | 73.6 (13)   | 8  | 12.5  | (-4.0, 29.0)   | 0.1158  |
| FVC, L                 | Baseline | 11                              | 3.3 (1.2)    | .  | .     | .              | .       | 10                              | 2.6 (1.2)   | .  | .     | .              | .       |
|                        | 1 month  | 11                              | 3.5 (1.2)    | 11 | 0.2   | (0.0, 0.4)     | 0.0154  | 9                               | 2.8 (1)     | 9  | 0.3   | (0.0, 0.7)     | 0.0392  |
|                        | 3 month  | 11                              | 3.5 (1.1)    | 11 | 0.2   | (0.0, 0.5)     | 0.0574  | 9                               | 3 (1.2)     | 9  | 0.4   | (0.1, 0.6)     | 0.0168  |
|                        | 6 month  | 9                               | 3.5 (1.1)    | 9  | 0.2   | (-0.1, 0.5)    | 0.1809  | 8                               | 3.1 (1.4)   | 8  | 0.5   | (0.0, 1.0)     | 0.0601  |
| BMI, kg/m <sup>2</sup> | Baseline | 11                              | 19.1 (3.3)   | .  | .     | .              | .       | 10                              | 22.7 (4.4)  | .  | .     | .              | .       |
|                        | 1 month  | 11                              | 19.5 (3.5)   | 11 | 0.4   | (0.0, 0.9)     | 0.0628  | 10                              | 23.4 (4.3)  | 10 | 0.8   | (0.2, 1.4)     | 0.0201  |
|                        | 3 month  | 11                              | 20 (3.9)     | 11 | 0.9   | (0.0, 1.7)     | 0.0470  | 9                               | 23.8 (4.7)  | 9  | 1.1   | (0.3, 1.9)     | 0.0126  |
|                        | 6 month  | 9                               | 20.3 (4.5)   | 9  | 1.3   | (0.0, 2.7)     | 0.0516  | 8                               | 24.1 (4.7)  | 8  | 1.4   | (0.6, 2.2)     | 0.0042  |
| Weight, kg             | Baseline | 11                              | 48.1 (15.6)  | .  | .     | .              | .       | 10                              | 64.3 (16.6) | .  | .     | .              | .       |
|                        | 1 month  | 11                              | 49.8 (16.1)  | 11 | 1.6   | (0.3, 2.9)     | 0.0180  | 10                              | 66.6 (17.3) | 10 | 2.3   | (0.4, 4.2)     | 0.0234  |
|                        | 3 month  | 11                              | 51.7 (16.7)  | 11 | 3.6   | (1.1, 6.0)     | 0.0084  | 9                               | 67.3 (18.2) | 9  | 3     | (0.6, 5.3)     | 0.0185  |
|                        | 6 month  | 9                               | 54 (18.2)    | 9  | 5.8   | (1.6, 9.9)     | 0.0123  | 8                               | 67.7 (19.8) | 8  | 4.3   | (1.8, 6.7)     | 0.0046  |
| Sweat Chloride, mEq/L  | Baseline | 10                              | 99 (12.2)    | .  | .     | .              | .       | 9                               | 79.2 (22.5) | .  | .     | .              | .       |
|                        | 1 month  | 11                              | 36.2 (19.1)  | 10 | -60.9 | (-73.9, -47.8) | <.0001  | 7                               | 46 (16.6)   | 6  | -41.3 | (-53.0, -29.5) | 0.0003  |
|                        | 3 month  | 11                              | 42.5 (24)    | 10 | -55.9 | (-76.0, -35.7) | 0.0001  | 8                               | 35.1 (15)   | 7  | -44.9 | (-56.3, -33.6) | <.0001  |
|                        | 6 month  | 9                               | 37.3 (30.3)  | 8  | -57.3 | (-85.8, -28.7) | 0.0021  | 7                               | 44.1 (31.3) | 6  | -37.2 | (-67.5, -6.8)  | 0.0253  |
| CFQR Respiratory Score | Baseline | 11                              | 74 (15.2)    | .  | .     | .              | .       | 10                              | 48.9 (15.2) | .  | .     | .              | .       |
|                        | 1 month  | 11                              | 85.1 (25.8)  | 11 | 11.1  | (-2.4, 24.6)   | 0.0973  | 10                              | 70.6 (15.3) | 10 | 21.7  | (4.2, 39.1)    | 0.0202  |
|                        | 3 month  | 11                              | 83.6 (20.5)  | 11 | 9.6   | (-1.3, 20.5)   | 0.0781  | 9                               | 80.9 (10.1) | 9  | 30.9  | (15.9, 45.8)   | 0.0014  |
|                        | 6 month  | 9                               | 82.7 (11.8)  | 9  | 7.1   | (-3.3, 17.5)   | 0.1526  | 8                               | 72.2 (23.2) | 8  | 22.2  | (-6.3, 50.7)   | 0.1080  |
| CFRSD Score            | Baseline | 8                               | 26.9 (7.8)   | .  | .     | .              | .       | 10                              | 41.8 (17.3) | .  | .     | .              | .       |
|                        | 1 month  | 8                               | 14.8 (13.1)  | 8  | -12.1 | (-20.1, -4.2)  | 0.0087  | 10                              | 30.9 (13.3) | 10 | -10.9 | (-27.6, 5.8)   | 0.1730  |
|                        | 3 month  | 8                               | 16.3 (16.5)  | 8  | -10.6 | (-26.7, 5.5)   | 0.1630  | 9                               | 22.8 (17.1) | 9  | -17.7 | (-39.5, 4.2)   | 0.0995  |
|                        | 6 month  | 7                               | 19.7 (11)    | 7  | -5.7  | (-15.7, 4.3)   | 0.2104  | 8                               | 27.4 (18.2) | 8  | -12.4 | (-35.7, 10.9)  | 0.2497  |
| SNOT-20 Score          | Baseline | 8                               | 0.8 (0.5)    | .  | .     | .              | .       | 10                              | 1.4 (0.7)   | .  | .     | .              | .       |
|                        | 1 month  | 8                               | 0.4 (0.4)    | 8  | -0.4  | (-0.8, 0.0)    | 0.0338  | 10                              | 0.9 (0.8)   | 10 | -0.4  | (-0.9, 0.1)    | 0.1090  |
|                        | 3 month  | 8                               | 0.4 (0.4)    | 8  | -0.4  | (-0.7, 0.0)    | 0.0446  | 9                               | 1 (0.9)     | 9  | -0.4  | (-0.9, 0.2)    | 0.1498  |
|                        | 6 month  | 7                               | 0.4 (0.2)    | 7  | -0.4  | (-1.0, 0.1)    | 0.0915  | 8                               | 1.2 (0.8)   | 8  | -0.1  | (-0.6, 0.4)    | 0.6920  |
